# Supplementary material
Source: Elsevier journal article supplement (https://www.sciencedirect.com/science/article/pii/S1885585722002031)
Supplement: mmc1 [file S1885585722002031:mmc1.pdf]

## SUPPLEMENTARY DATA

### Figure 1 of the supplementary data.

Distribution of participants according to DAPT duration

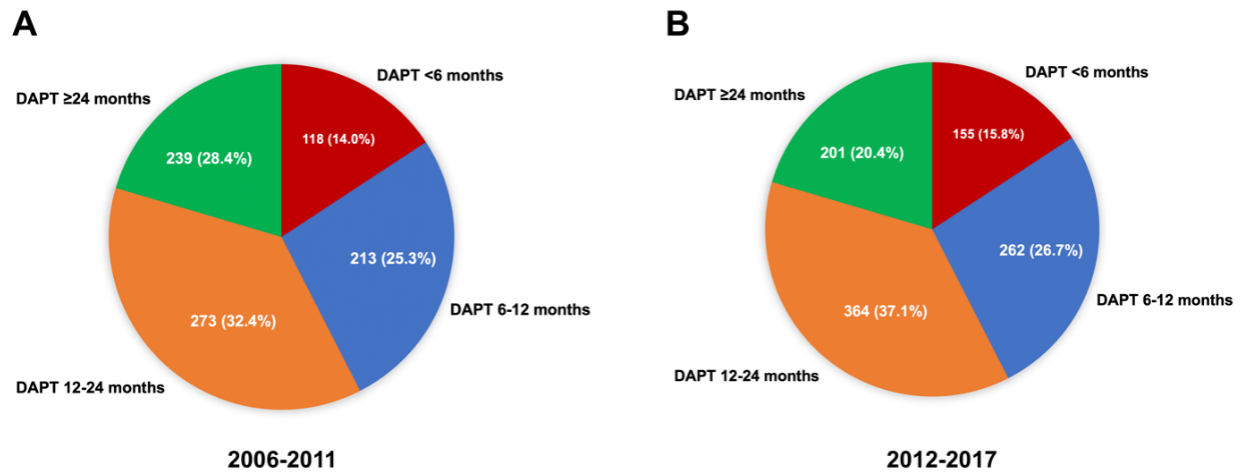

Distribution of participants, A: from 2006 to 2011, B: from 2012 to 2017. Values are presented as No. (%). DAPT, dual antiplatelet therapy.

## Figure 2 of the supplementary data

### Spline curves

Duration-response relationships between DAPT duration and clinical outcomes—MACE and major bleeding (MB) according to stent strategies (A), and with or without bifurcation lesion (B) by log-linear model with thin-plate spline curves. DAPT, dual antiplatelet therapy; LM, left main; MACE, major adverse cardiovascular events; MB, major bleeding.

#### A. 1-stent patients: 1512; 2-stent patients: 303

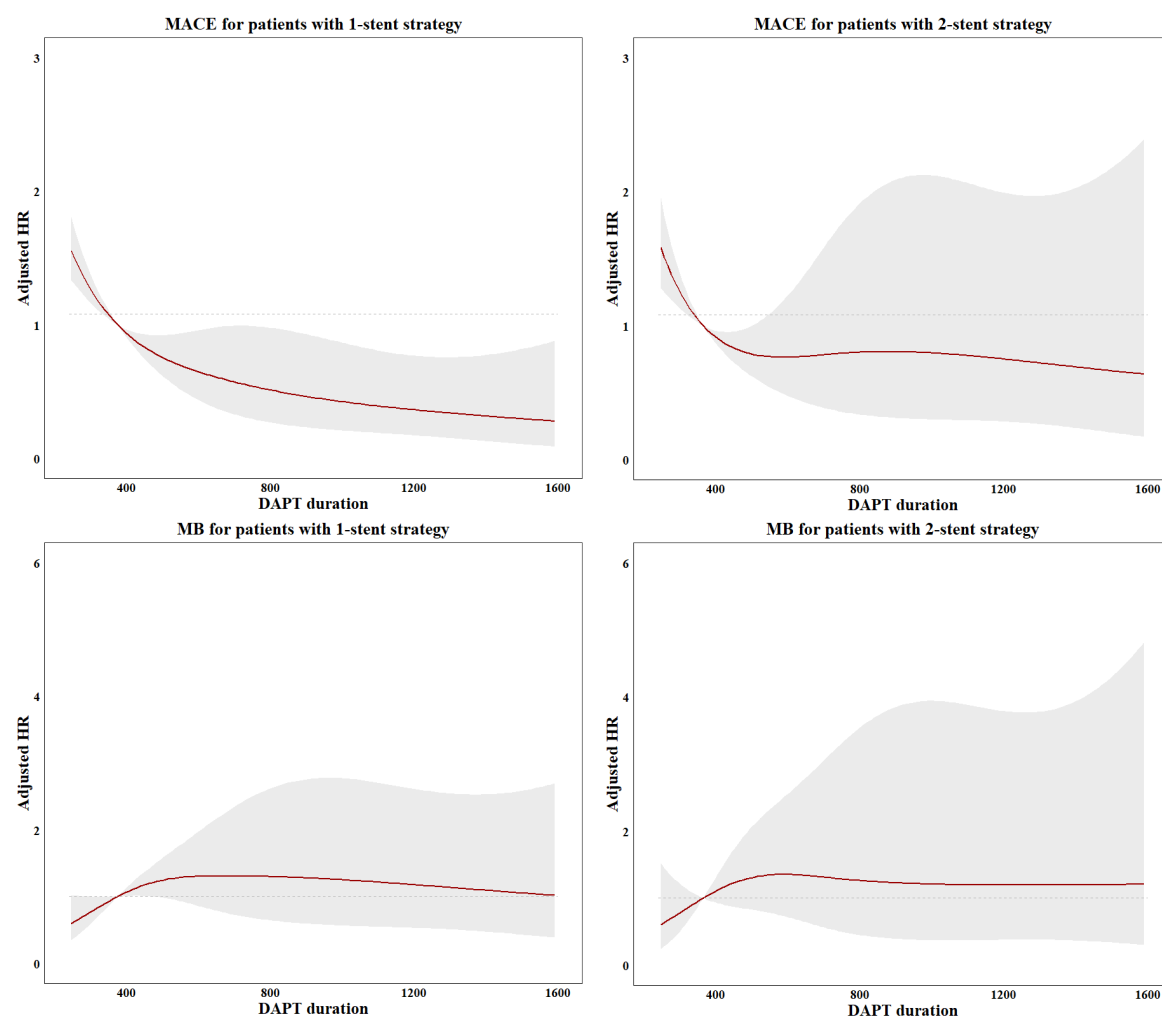

**B.** LM with bifurcation lesion patients: 1244; LM without bifurcation lesion patients:

583

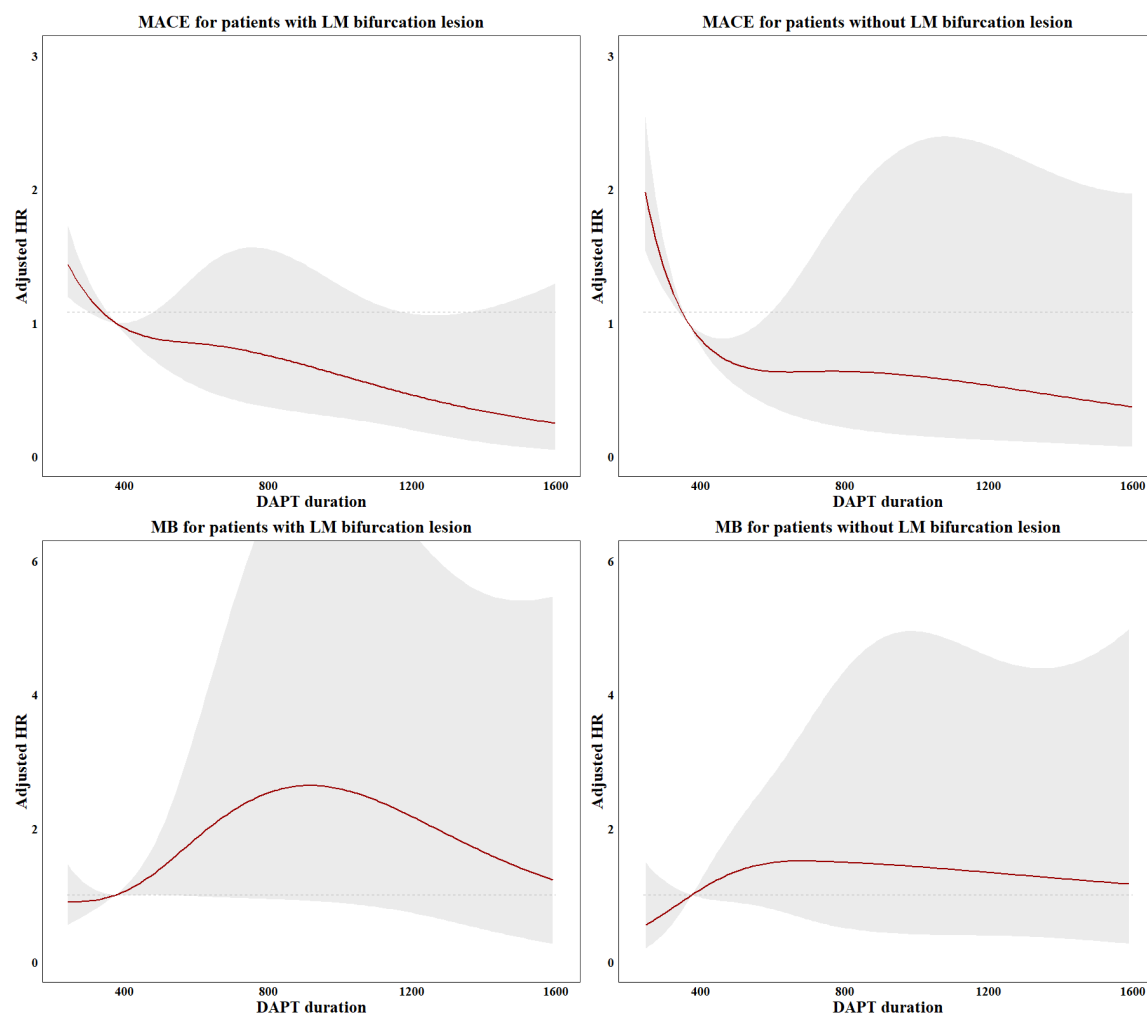

Figure 3 of the supplementary data.

A: cumulative 5-year incidence of cardiac death, B: myocardial infarction, C: stent thrombosis, D: all-cause death, E: target vessel revascularization, and F: minor bleeding, according to dual antiplatelet therapy (DAPT) duration.

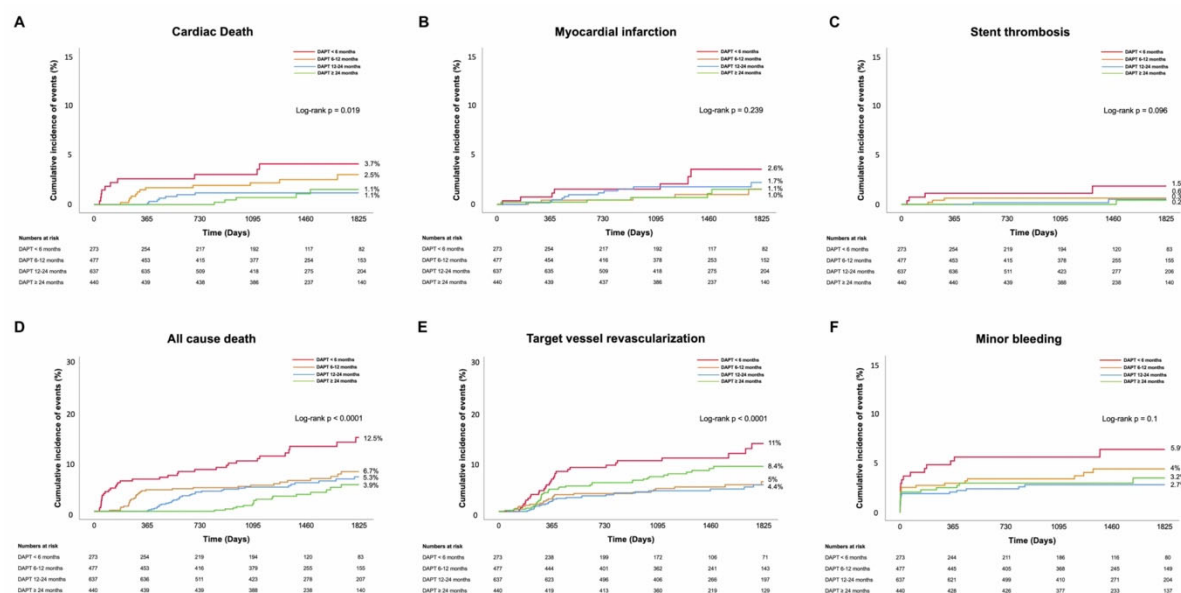

Figure 4 of the supplementary data

Distributional balance of propensity scores according to DAPT duration

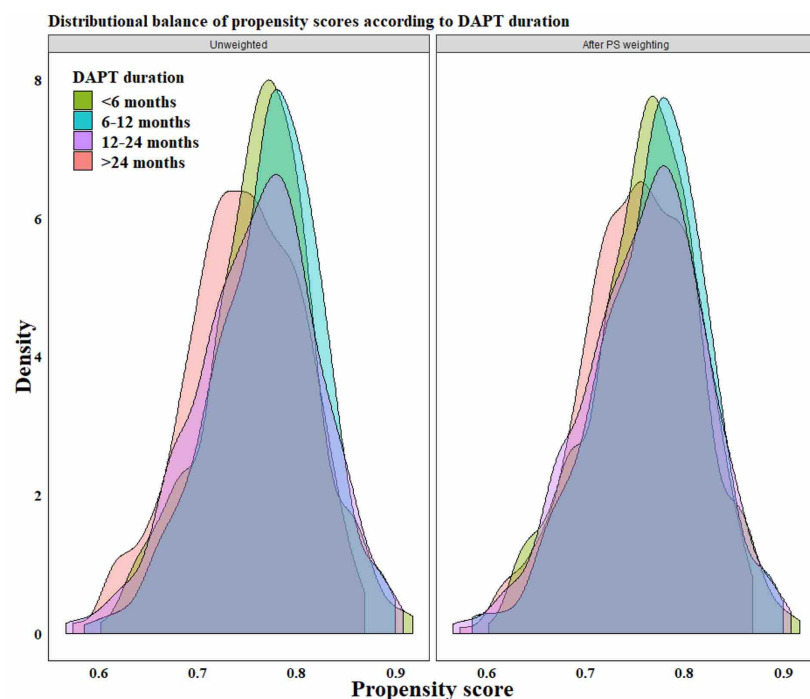

PS, propensity score; DAPT, dual antiplatelet therapy.

**Supplementary table 1.** Factors associated with MACE (Cox regression analysis)

| Variables                   | Multivariable adjusted |              |        |
|-----------------------------|------------------------|--------------|--------|
|                             | HR                     | 95%CI        | P      |
| Age, y                      | 1.008                  | 0.988-1.029  | .416   |
| Male sex                    | 1.179                  | 0.722-1.924  | .510   |
| Diabetes mellitus           | 2.085                  | 1.377-3.155  | < .001 |
| Hypertension                | 1.171                  | 0.751-1.825  | .486   |
| Dyslipidemia                | 0.863                  | 0.583- 1.278 | .463   |
| Chronic kidney disease      | 5.143                  | 3.299-8.018  | < .001 |
| Smoking                     | 1.140                  | 0.729-1.784  | .566   |
| Previous PCI                | 0.526                  | 0.218-1.270  | .153   |
| Previous CABG               | 1.805                  | 0.804-4.051  | .152   |
| Clinical Indication for PCI |                        |              |        |
| Stable angina               | 0.948                  | 0.637-1.411  | .794   |
| Acute coronary syndrome     | 1.218                  | 0.847-1.532  | .341   |
| Unstable angina             | 1.123                  | 0.551-2.288  | .749   |
| NSTEMI                      | 1.125                  | 0.730-1.732  | .594   |
| STEMI                       | 1.345                  | 0.824-2.197  | .236   |
| Mean ejection fraction, %   | 0.964                  | 0.951-0.976  | < .001 |

CABG, coronary artery bypass grafting; NSTEMI, non-ST-segment elevation myocardial infarction; PCI, percutaneous coronary intervention; STEMI, ST-segment elevation myocardial infarction.
